# Supplementary material
Source: HighWire-hosted journal article supplement (https://ijgc.bmj.com/highwire/filestream/23423/field_highwire_adjunct_files/2/ijgc-2021-003132supp003_data_supplement.pdf)
Supplement: ijgc-2021-003132supp003_data_supplement.pdf [file ijgc-2021-003132supp003_data_supplement.pdf]

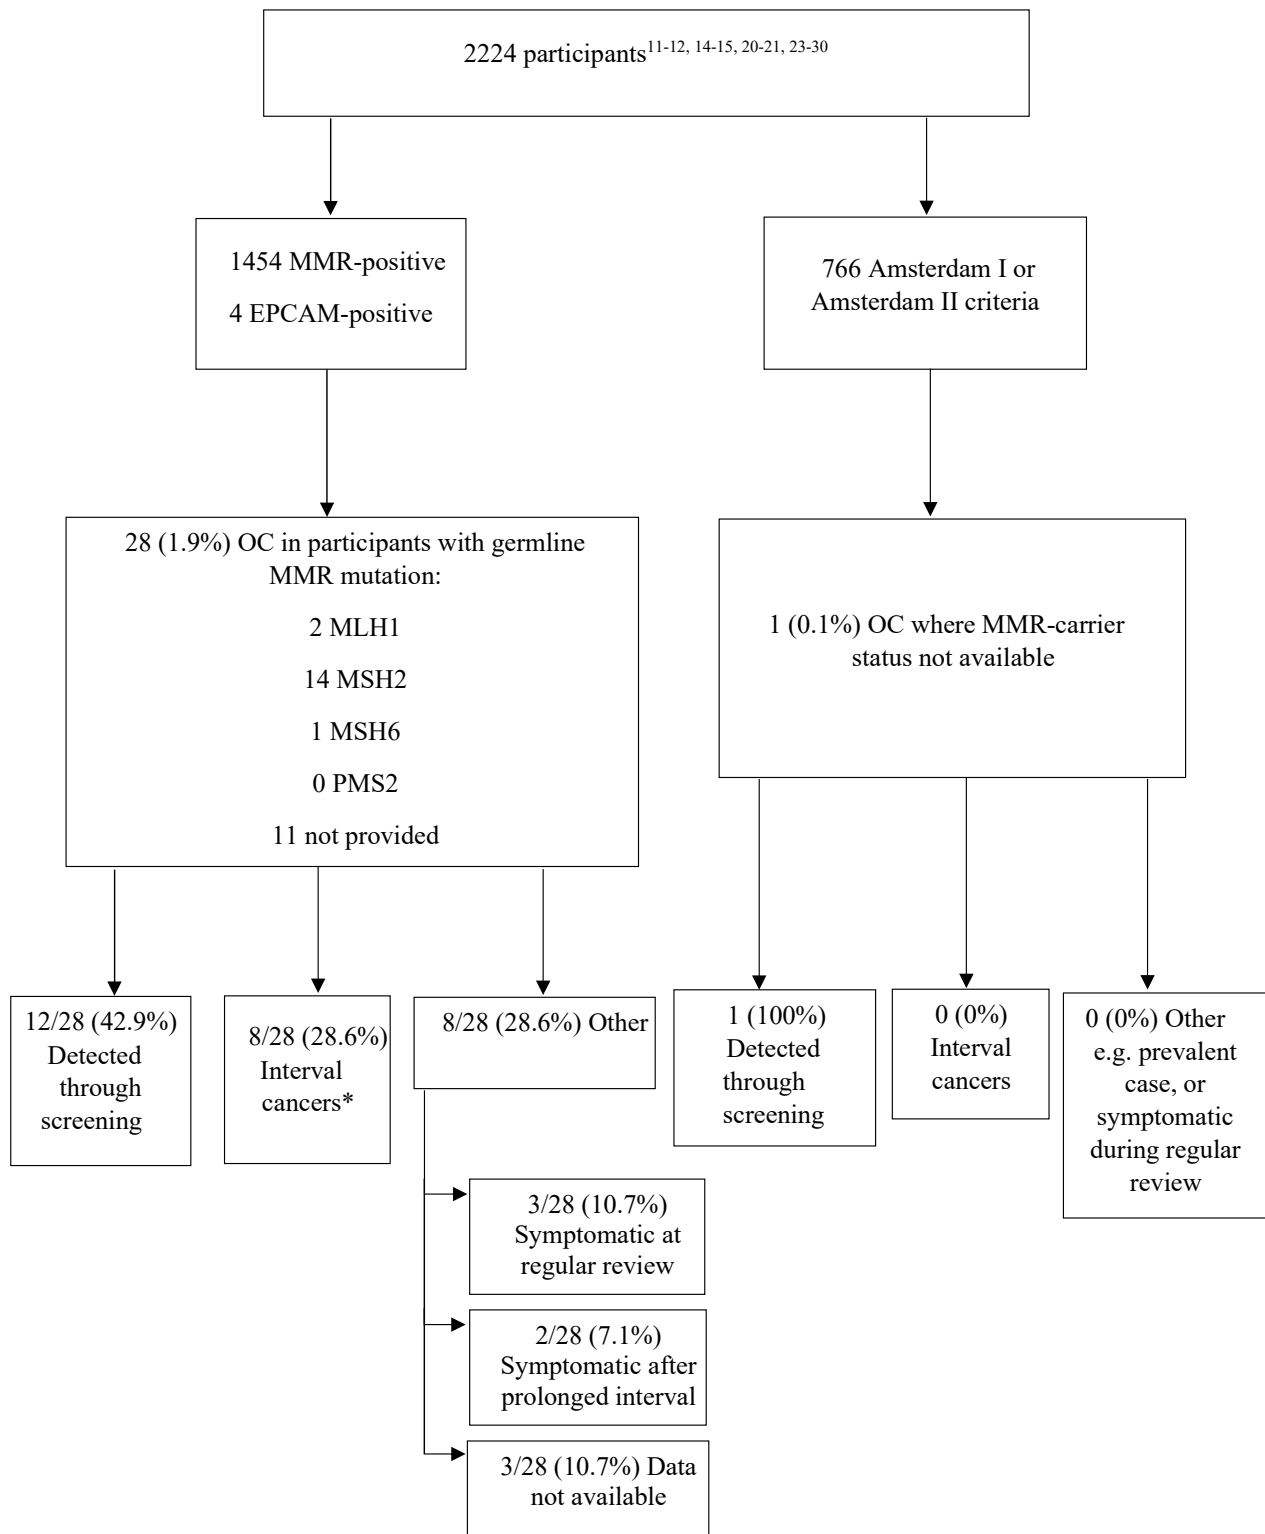

**Supplemental Figure 3.** Detection of ovarian cancers (OC) through screening according to MMR carrier status. Screening methods included TVUS and CA-125. There were 2224 individuals across 14 studies, 1458 of which had confirmed germline MMR/EPCAM mutation. Of mutation carriers, 1.9% were diagnosed with OC, screening detected 42.9% of these, while the remainder were diagnosed between screening intervals or presented with symptoms during a prevalent visit or regular review. 766 participants did not have MMR carrier status available; only 1 case of OC (0.1%), a prevalent case, was diagnosed. \*Two of these women in screening programs had incidental ovarian cancers found during surgery for endometrial cancer.
